# Supplementary material for: New biophysical probes for structure–activity analyses of vacuolar-H+-ATPase enzymes
Source: Royal Society of Chemistry journal article supplement (doi:10.1039/b311401e), 2003-01-01
Supplement: b311401e.pdf [file b311401e.pdf]

**Methyl (2Z, 4E)-5-(5,6-dichloro-2-indolyl)-2-methoxy-2,4-pentadienoate**

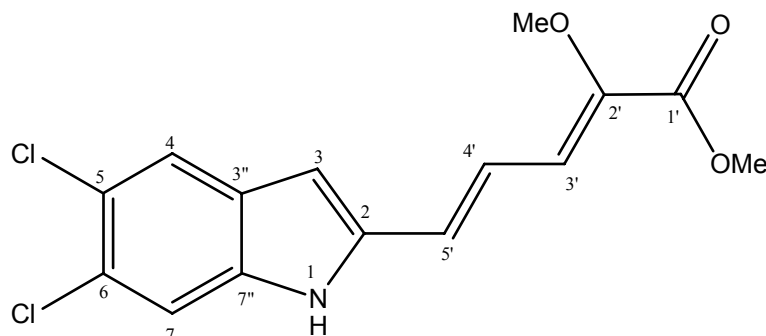

Methyl (2Z, 4E)-5-(5,6-dichloro-2-indolyl)-2-methoxy-2,4-pentadienoate, yellow crystalline solid, m.p. 200-202°C; *R<sub>f</sub>* 0.25 (EtOAc: Petrol; 1:4);  $\nu_{\max}/\text{cm}^{-1}$  (nujol mull) 3334 (NH), 2925 (CH), 2855 (9CH), 1697 (C=O), 1605 (C=C);  $\delta_{\text{H}}$  (300 MHz, DMSO) 11.81 (1 H, s, NH), 7.73 (1 H, s, H<sub>4</sub>), 7.51 (1 H, s, H<sub>7</sub>), 7.19 (1 H, dd, *J* 11.0 and 16.0, H<sub>4'</sub>), 6.97 (1 H, d, *J* 16.0, H<sub>5'</sub>), 6.88 (1 H, d, *J* 11.0, H<sub>3'</sub>), 6.59 (1 H, s, H<sub>3</sub>), 3.75 (3 H, s, CO.OCH<sub>3</sub>), 3.72 (3 H, s,  $\alpha$ OCH<sub>3</sub>);  $\delta_{\text{C}}$  (75 MHz, DMSO) 163.8 (C=O), 145.3 (C<sub>2'</sub>), 138.9 (C<sub>2</sub>), 136.9 (C<sub>7''</sub>), 128.5 ( $\delta$ C), 127.6 (C<sub>3'</sub>), 125.5 (C<sub>5</sub>), 125.1 (C<sub>6</sub>), 122.3 (C<sub>3''</sub>), 121.9 (C<sub>7</sub>), 121.6 (C<sub>4'</sub>), 112.7 (C<sub>4</sub>), 104.8 (C<sub>3</sub>), 60.6 (OCH<sub>3</sub>), 52.3 (OCH<sub>3</sub>); *m/z* (EI) 325.0271 (895, M<sup>+</sup> C<sub>15</sub>H<sub>13</sub>NO<sub>3</sub>Cl<sub>2</sub> requires 325.0272), 327 (36, M<sup>+</sup> C<sub>15</sub>H<sub>13</sub>NO<sub>3</sub>Cl<sup>35</sup>Cl<sup>37</sup>), 325 (57, M<sup>+</sup> C<sub>15</sub>H<sub>13</sub>NO<sub>3</sub>Cl<sub>2</sub><sup>35</sup>), 295 (45, M<sup>+</sup>-MeOH), 293 (72, M<sup>+</sup>-MeOH), 268 (54, M<sup>+</sup>-CO<sub>2</sub>Me), 266 (81, M<sup>+</sup>-CO<sub>2</sub>Me), 250 (41, M<sup>+</sup>-75), 233 (34, M<sup>+</sup>-94), 231 (100, M<sup>+</sup>-94), 224 (49, M<sup>+</sup>-103), 223 (35, M<sup>+</sup>-102), 222 (70, M<sup>+</sup>-103), 216 (32, M<sup>+</sup>-109), 188 (71, M<sup>+</sup>-137).

Literature characterisation from reference 3b

1572 *Journal of Medicinal Chemistry*, 1998, Vol. 41, No. 10

the crude compound was purified by flash chromatography (hexane/EtOAc, 7/3). After trituration with <sup>3</sup>Pr<sub>2</sub>O, methyl (2Z,4E)-5-(5,6-dichloro-2-indolyl)-2-methoxy-2,4-pentadienoate (**2**) (14 g, 89.6%) was obtained as a yellow powder, mp 202–204 °C. IR (Nujol): 3400, 1700, 1610 cm<sup>-1</sup>. <sup>1</sup>H NMR (DMSO-*d*<sub>6</sub>):  $\delta$  11.82 (s, 1H); 7.77 (s, 1H); 7.52 (s, 1H); 7.21 (dd, 1H); 7.00 (d, 1H); 6.89 (d, 1H); 6.62 (s, 1H); 3.76 (s, 1H); 3.73 (s, 1H). MS (ESI NEG): 324 (M – H). Anal. (C<sub>15</sub>H<sub>13</sub>NO<sub>3</sub>Cl<sub>2</sub>) C, H, N, Cl.

| irradiation  | nOe  |      |      |      |      |      |      |        |              |  |
|--------------|------|------|------|------|------|------|------|--------|--------------|--|
|              | NH   | H4   | H7   | H4'  | H5'  | H3'  | H3   | CO.OMe | $\alpha$ OMe |  |
| NH           | -100 | 0    | 5.2  | 6.4  | 0    | 0    | 0    | 0      | 0            |  |
| H4           | 0    | -100 | 0    | 0    | 0    | 0    | 2.4  | 0      | 0            |  |
| H7           | 1.6  | 0    | -100 | 0    | 0    | 0    | 0    | 0      | 0            |  |
| H4'          | 3.5  | 0    | 0    | -100 | 0    | 2.1  | 1.3  | 0      | 1.9          |  |
| H5'          | 0    | 0    | 0    | 0    | -100 | 5.3  | 4.7  | 0      | 0            |  |
| H3'          | 0    | 0    | 0    | 2.1  | 1.1  | -100 | 0    | 0      | 0            |  |
| H3           | 0    | 2.7  | 0    | 0    | 2.6  | 0    | -100 | 0      | 0            |  |
| CO.OMe       | 0    | 0    | 0    | 0    | 0    | 0.6  | 0    | -100   | 0            |  |
| $\alpha$ OMe | 0    | 0    | 0    | 2.1  | 0    | 0    | 0    | 0      | -100         |  |

(2*Z*, 4*E*)-5-(5,6-Dichloro-2-indolyl)-2-methoxy-2,4-pentadienoic acid

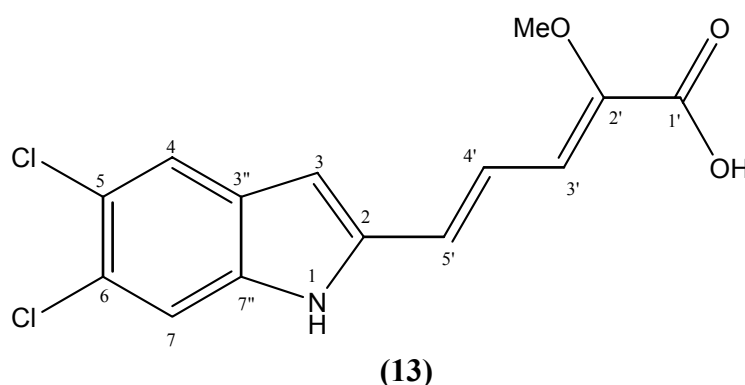

A suspension of methyl (2*Z*, 4*E*)-5-(5,6-dichloro-2-indolyl)-2-methoxy-2,4-pentadienoate (1 g, 3.1 mmol) and 20% NaOH (1.4 ml, 6.7 mmol) in MeOH (3 ml) and THF (5.5 ml) was heated at 55°C for 2h. After cooling to room temperature the organic solvent was evaporated and the residue was acidified with 20% HCl, and the precipitate was collected by filtration, washed with water and dried at 60°C under vacuum to obtain (2*Z*, 4*E*)-5-(5,6-dichloro-2-indolyl)-2-methoxy-2,4-pentadienoic acid (0.7 g, 73%) as a green powder, m.p. 234-236°C; *R<sub>f</sub>* 0.45 (MeOH: EtOAc, 1:4);  $\nu_{\max}/\text{cm}^{-1}$  3382 (CH), 3055 (CH), 2987 (OH), 1676 (C=O), 1609 (C=O),  $\delta_{\text{H}}$  (300 MHz, MeOH) 11.78 (1 h, bs, NH), 7.74 (1 H, s, ArH), 7.51 (1 H, s, ArH), 7.19 (1 H, dd, *J* 11.2 and 15.7 Hz H<sub>4'</sub>), 6.94 (1 H, d, *J* 15.7 Hz, H<sub>5'</sub>), 6.84 (1 H, d, *J* 11.2 Hz, H<sub>3'</sub>), 3.73 (3 H, s, OCH<sub>3</sub>);  $\delta_{\text{C}}$  (75 MHz, MeOH) 164.8 (C=O), 146.3, 139.1, 136.9,

Supplementary Material (ESI) for Organic & Biomolecular Chemistry  
This journal is © The Royal Society of Chemistry 2003

128.6, 126.8, 124.9, 124.7, 122.3, 121.6, 112.7, 104.4 (11 C), 60.4 (OCH<sub>3</sub>); *m/z* (EI)  
312.1 (40%, M<sup>+</sup>), 311.1 (59, M<sup>+</sup>), 281.1 (44, M<sup>+</sup>-MeOH), 279.1 (64, M<sup>+</sup>-MeOH),  
266.1 (40, M<sup>+</sup>-CO<sub>2</sub>H), 231.1 (50, M<sup>+</sup>-80), 224.1 (34, M<sup>+</sup>-88), 223.1 (35, M<sup>+</sup>-88),  
222.1 (40, M<sup>+</sup>-190), 200.1 (54, M<sup>+</sup>-112), 198.1 (79, M<sup>+</sup>-113), 183.0 (60, M<sup>+</sup>-128).
